# Supplementary material
Source: Springer Nature journal article supplement (https://www.springermedizin.de/resource/supplementary/12888_2010_831_MOESM1_ESM.pdf/9478930)
Supplement: MOESM1 [file 9478930]

Records identified through database searching  
(n = 525)

Excluded based on title or  
Abstract (n = 404)

Full-text retrieved (n = 121)

Excluded: No RCT (n = 33)  
Pharmacotherapy trials (n = 26)  
Not exclusively  
psychotherapy (n = 25)  
Other reasons (n = 24)

Included (n = 13)

Cardiovascular (n = 5)

Stroke (n = 3)

Prostatic hyperplasia (n = 2)

Diabetes mellitus (n = 1)

Leukemia (n = 1)

Other (n = 1)
